# Supplementary material for: Effective Synthesis of Highly Oxidized Graphene Oxide That Enables Wafer-scale Nanopatterning: Preformed Acidic Oxidizing Medium Approach
Source: PubMed Central journal article supplement (PMC5478619; doi:10.1038/s41598-017-04139-0), 2017-06-20

Supplementary information for

# Effective Synthesis of Highly Oxidized Graphene Oxide That Enables Wafer-scale Nanopatterning: Preformed Acidic Oxidizing Medium Approach

Chun-Hu Chen,<sup>a\*</sup> Shin Hu,<sup>a</sup> Jyun-Fu Shih,<sup>b</sup> Chang-Ying Yang,<sup>a</sup> Yun-Wen Luo,<sup>a</sup> Ren-Huai Jhang,<sup>a</sup> Chao-Ming Chiang,<sup>a\*</sup> and Yung-Jr Hung<sup>b\*</sup>

<sup>a</sup>Department of Chemistry, <sup>b</sup>Department of Photonics, National Sun Yat-sen University, Kaohsiung, Taiwan 80424

Figure S-1. The photographs of 325-mesh graphite (left) and 0.8 mm graphite (right), respectively. The later one is the starting material for the diffusion study.

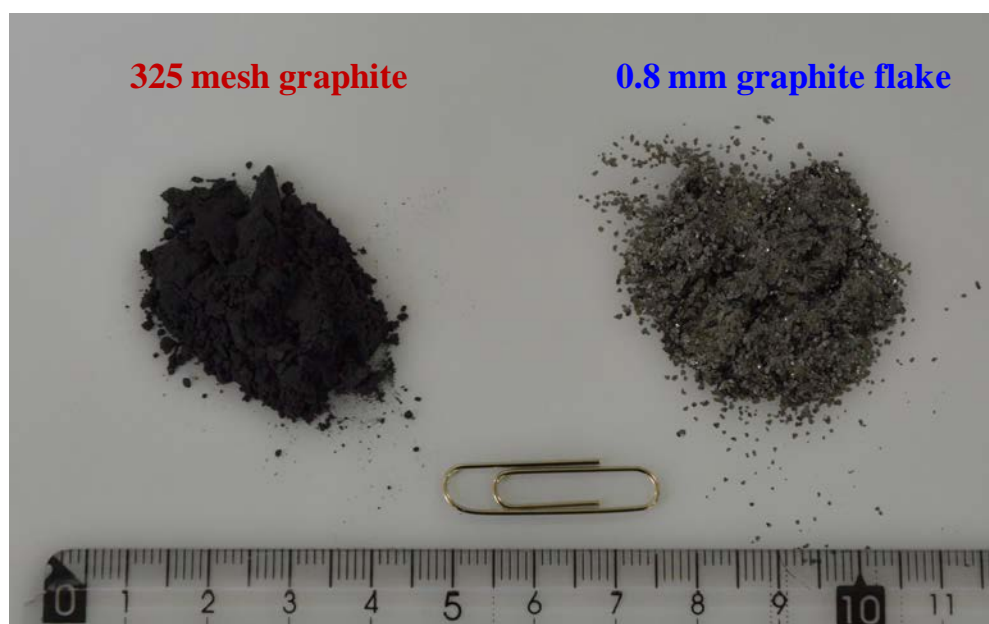

Figure S-2. The IR comparison of the GO samples. The -OH stretching ( $3000-3500\text{ cm}^{-1}$ , the pink area), C=O stretching ( $1720-1740\text{ cm}^{-1}$ , the blue area), C=C ( $1590-1620\text{ cm}^{-1}$ , the purple area), C-O ( $1250\text{ cm}^{-1}$ , the orange area), and C-O-C epoxy ( $1060\text{ cm}^{-1}$ , the green area) are observed in these GO products.

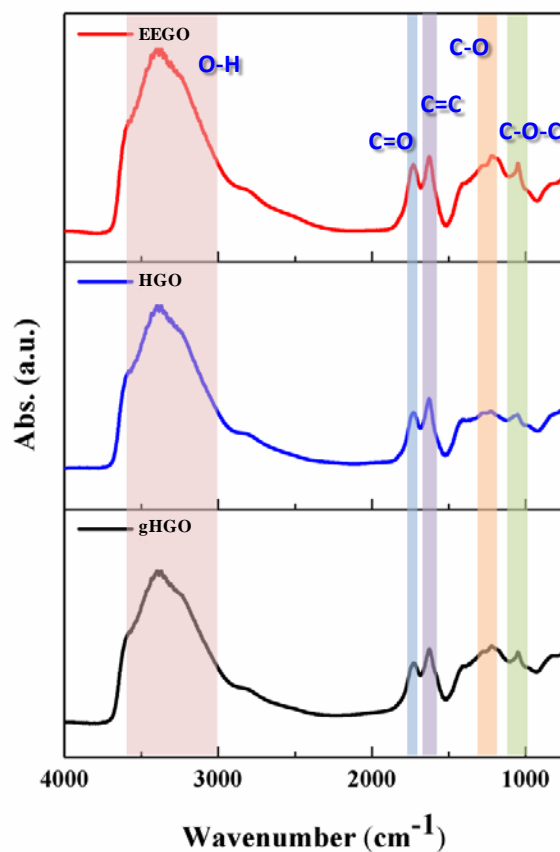

Figure S-3. The comparison of black precipitation collected after the high-speed centrifuge of 6000 rpm. The trace amount of precipitation in EEGO clearly shows the greatest dispersion homogeneity among all the other samples, corresponding well to the DLS results.

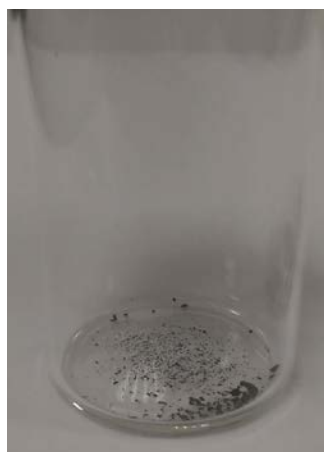

EEGO

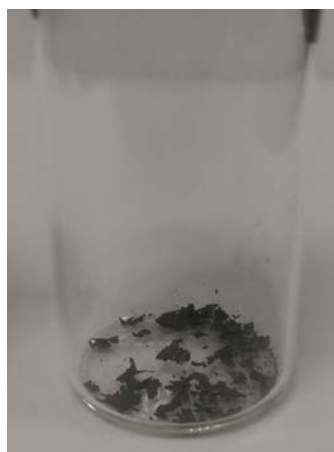

HGO

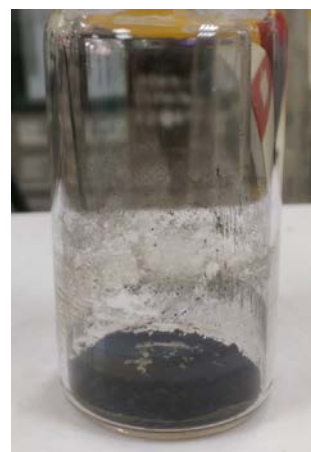

gHGO

Figure S-4. The photographs (a-b) and XPS results (c) of 10X-EEGO prepared by PAOM within 1-2 hours.

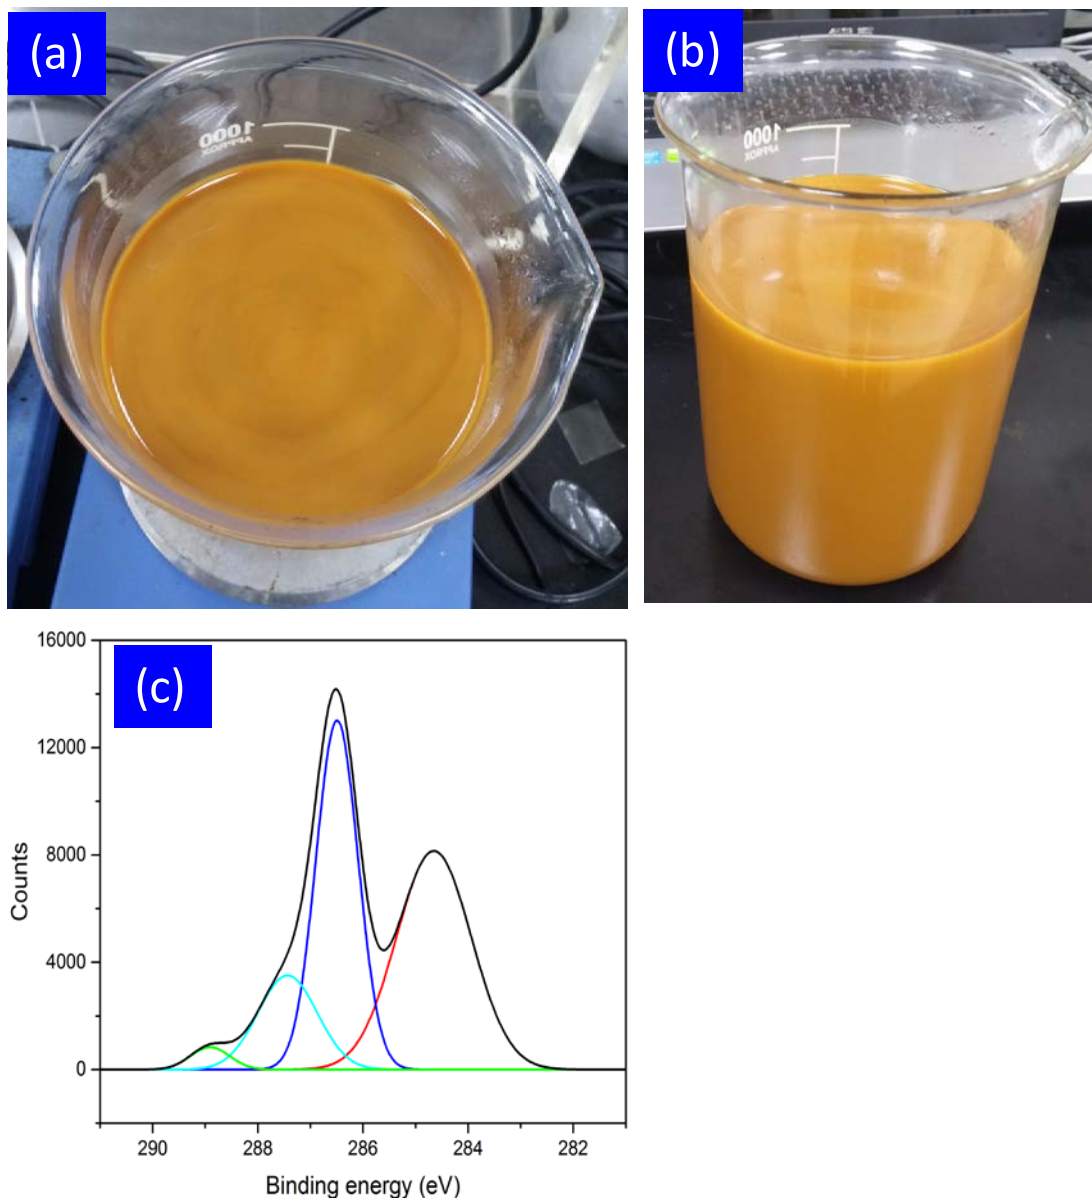

Figure S-5. The comparison of electrochemical sensing performance toward  $\text{H}_2\text{O}_2$  in PBS. The cyclic voltammogram (CV) results of EEGO (a) and HGO (b) in the presence of  $\text{H}_2\text{O}_2$  over a concentration range from 1.0 to 5.0 mM at a scan rate of  $50 \text{ mV s}^{-1}$ .

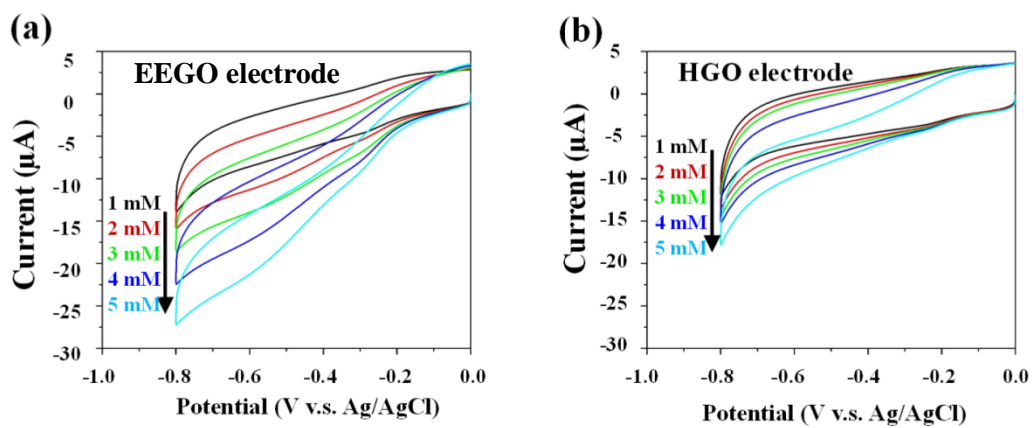

Figure S-6. The AFM results of spin-coat EEGO films on 2-inch wafer before patterning. The average RMS value of various wafer areas (A-E of Fig. 6) is 0.590 nm.

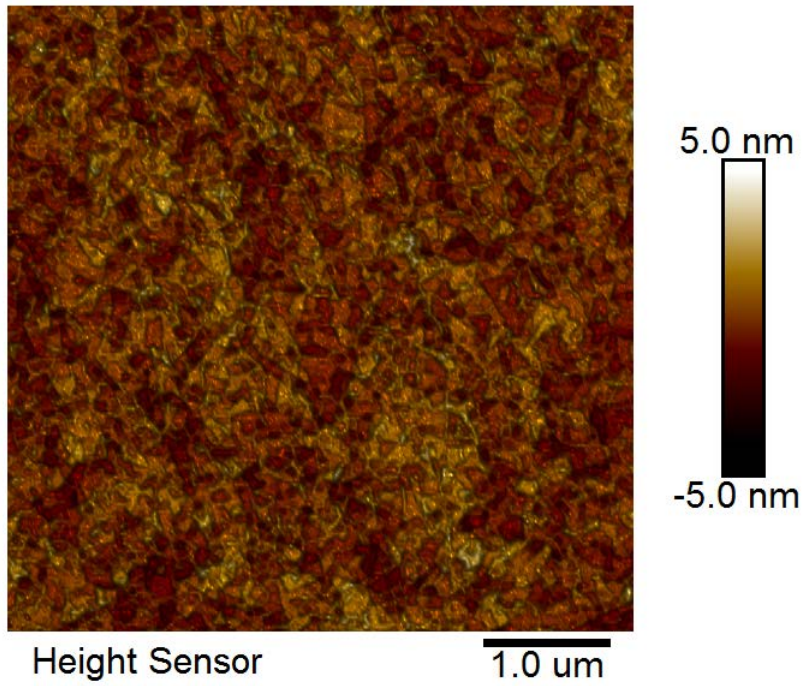

Figure S-7. Raman spectra of (a) spherical GO patterns with two-dimensional GO array (period = 10  $\mu\text{m}$ ). The Raman spectra demonstrate that the GO material can be completely removed after oxygen plasma etching due to the absence of characteristic D and G bands of GO outside the GO pattern. This results verify the generation of discontinuous GO nanopatterning.

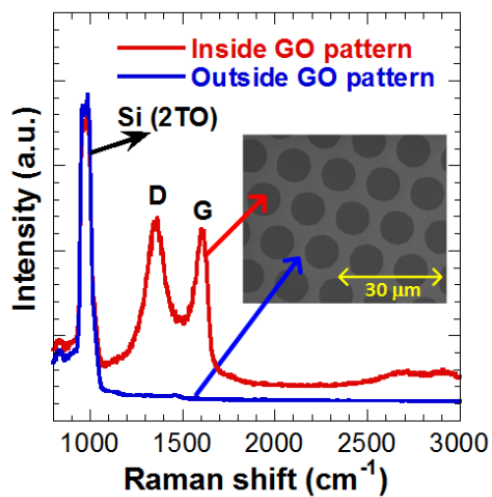

Supplement: 41598_2017_4139_MOESM1_ESM.pdf [file 41598_2017_4139_MOESM1_ESM.pdf]
